# Supplementary material
Source: PubMed Central journal article supplement (PMC3686353)
Supplement: mmc1.pdf [file mmc1.pdf]

# **A Simplified Implementation of the Bubble Analysis of Biopolymer Network Pores**

Stefan Münster\* and Ben Fabry

Department of Physics, University Erlangen-Nürnberg, Erlangen, Germany and Max-Planck-Institute for the Science of Light, Erlangen, Germany

Simplifying the Bubble Analysis

Münster and Fabry

Submitted March 20, 2013, and accepted for publication May 1, 2013.

\*Correspondence: [stefan@stefanmuenster.de](mailto:stefan@stefanmuenster.de)

```

function [bubble_radii bubble_coord]=find_bubbles(img)
% find_bubbles determines the location and radii of 2D or 3D bubbles in
% the binary image img.
%
% 19|03|2013 Stefan Münster

EDM=bwdist(img); % This calculation of the EDM of the fluid phase assumes
that fluid pixels are 0 and solid pixels are 1;

smoothed_EDM=imfilter(EDM,fspecial('gaussian',5,1)); % this smoothing
suppresses bubbles of similar size in close proximity and can be omitted

local_maxima=imregionalmax(smoothed_EDM); % determines the local maxima,
which are the center locations of the bubbles

if(length(size(img))<3) % translates local maxima into x,y,z coordinates
    [bubble_coord(:,1)
bubble_coord(:,2)]=ind2sub(size(img),find(local_maxima));
else
    [bubble_coord(:,1) bubble_coord(:,2)
bubble_coord(:,3)]=ind2sub(size(img),find(local_maxima));
end

bubble_radii=EDM(local_maxima); % determines the radii of the bubbles from
the EDM values at the local maxima

end

```
